# Supplementary material
Source: publisher figshare collection journal article supplement (https://acs.figshare.com/ndownloader/files/26428429)
Supplement: Supplementary file 1 [file 26428429]

## Supporting Information

### Impact of the Gas-Liquid interface on Photochemical Vapor Generation

Ying Yu<sup>†</sup>, Hanjiao Chen<sup>‡</sup>, Qian Zhao<sup>†</sup>, Qing Mou<sup>†</sup>, Liang Dong<sup>†</sup>, Ruilin Wang<sup>§</sup>, Zeming Shi<sup>†</sup>, and Ying Gao<sup>†,\*</sup>

<sup>†</sup> State Key Laboratory of Geohazard Prevention and Geoenvironment Protection, College of Earth Sciences, Chengdu University of Technology, Sichuan 610059, China

<sup>‡</sup> Analytical & Testing Center, Sichuan University, Sichuan 610064, China

<sup>§</sup> College of Materials and Chemistry & Chemical Engineering, Chengdu University of Technology, Sichuan 610059, China

\*Corresponding author E-mail: [Ying.gaoy@gmail.com](mailto:Ying.gaoy@gmail.com);

Ying Yu and Hanjiao Chen made equal contributions to this work.

## Table of Contents

|                                                                                                        |     |
|--------------------------------------------------------------------------------------------------------|-----|
| Figure S1. Time-resolved profiles of W, Ir, Se, Os, Sb, and Te in LS-FI-PVG and AS-FI-PVG systems----- | S3  |
| Figure S2. Effect of the volume of the air segment on Hg, Fe, Co, Tl, and Ni detection-----            | S4  |
| Figure S3. Effect of the air/Ar slug(s) on As, Sn, Ir, Os, Cd, Ni, Hg, and Mo detection-----           | S5  |
| Figure S4. Effect of the concentration of H <sub>2</sub> O <sub>2</sub> on Sn detection-----           | S6  |
| Figure S5. EPR results for Sn PVG medium in LS-FI-PVG system -----                                     | S7  |
| Figure S6. Effect of the internal temperature of PVG reactor on Sn, As, Cd, and Mo detection-----      | S8  |
| Figure S7. Effect of the sample solution temperature on As and Sn detection-----                       | S9  |
| Figure S8. Effect of the gas-liquid interfaces on As and Sn detection-----                             | S10 |
| Figure S9. Effect of the Ar carrier gas flow rate on As and Sn detection -----                         | S11 |
| Figure S10. Calibration curves established by LS-FI-PVG and AS(s)-FI-PVG methods----                   | S12 |
| Table S1. Precision obtained using peak area by LS-FI-PVG and AS(s)-FI-PVG methods-                    | S13 |
| Table S2. Interferences from coexisting ions obtained in AS(s)-FI-PVG system-----                      | S14 |

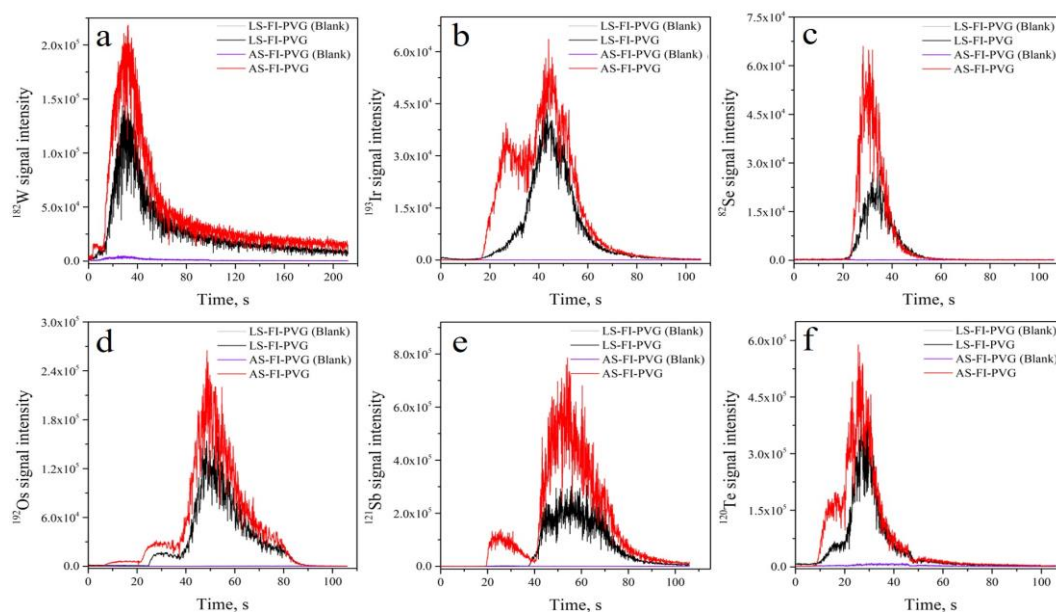

Figure S1. Time-resolved profiles of W, Ir, Se, Os, Sb, and Te in LS-FI-PVG, and AS-FI-PVG (air slug preceding the sample solution): a) 20 ng mL<sup>-1</sup> W, 40% (v/v) FA, 500 mg L<sup>-1</sup> Cd<sup>2+</sup>, 120 s UV irradiation time, and 2.24 mL of air slug; b) 2 ng mL<sup>-1</sup> Ir, 20% (v/v) FA; 25 mg L<sup>-1</sup> Cu<sup>2+</sup>, 45 s UV irradiation time, and 1.60 mL of air slug; c) 10 ng mL<sup>-1</sup> Se (IV), 15% (v/v) FA, 13 s UV irradiation time, and 2.88 mL of air slug; d) 5 ng mL<sup>-1</sup> Os, 5% (v/v) HNO<sub>3</sub>, 150 s UV irradiation time, and 0.77 mL of air slug; e) 10 ng mL<sup>-1</sup> Sb, 5% (v/v) FA, 20% (v/v) AA, 60 s UV irradiation time, and 2.24 mL of air slug; f) 10 ng mL<sup>-1</sup> Te, 2% (v/v) FA, 20% (v/v) FA, 20 mg L<sup>-1</sup> Fe<sup>2+</sup>, 5 g L<sup>-1</sup> nano-TiO<sub>2</sub>, 50 s UV irradiation time, and 1.28 mL of air slug.

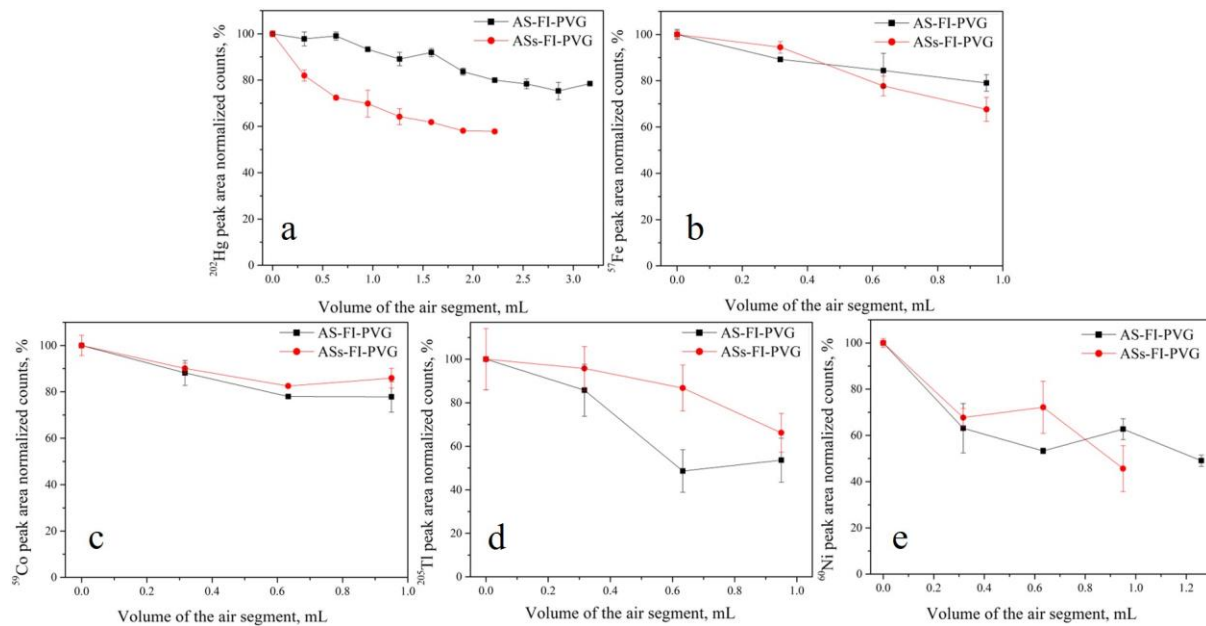

Figure S2. Effect of the volume of the air segment on  $^{202}\text{Hg}$ ,  $^{57}\text{Fe}$ ,  $^{59}\text{Co}$ ,  $^{205}\text{Tl}$  and  $^{60}\text{Ni}$  responses: a)  $10\text{ ng mL}^{-1}\text{ Hg}$ , 15% (v/v) FA, and 13 s UV irradiation time; b)  $10\text{ ng mL}^{-1}\text{ Fe}$ , 60% (v/v) FA, and 180 s UV irradiation time; c)  $10\text{ ng mL}^{-1}\text{ Co}$ , 50% (v/v) FA, and 180 s UV irradiation time; d)  $20\text{ ng mL}^{-1}\text{ Tl}$ , 20% (v/v) FA,  $20\text{ mg L}^{-1}\text{ Co}^{2+}$  and 110 s UV irradiation time; e)  $10\text{ ng mL}^{-1}\text{ Ni}$ , 50% (v/v) FA, and 180 s UV irradiation time.

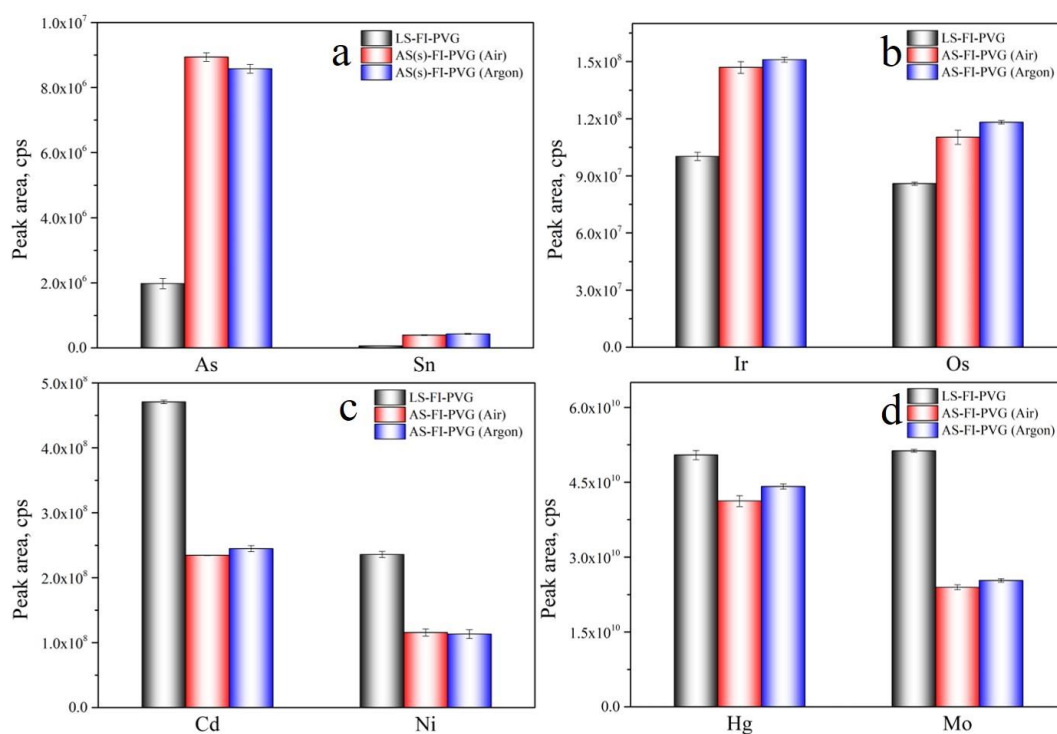

Figure S3. Effect of the air/Ar slugs on As, Sn, Ir, Os, Cd, Ni, Hg and Mo responses in AS(s)-FI-PVG system. a) As, 4% (v/v) FA, 20% (v/v) AA, 15 mg L<sup>-1</sup> Fe<sup>3+</sup>, 30 s irradiation, and 2.88 mL of air slug preceding the sample; Sn, 0.8% (v/v) AA, 0.01% (v/v) HCl, 32 s irradiation, and 1.60 mL of air slugs preceding and succeeding the sample; b) Ir, 20% (v/v) FA, 25 mg L<sup>-1</sup> Cu<sup>2+</sup>, 45 s UV irradiation time, and 1.60 mL of air slug preceding the sample; Os, 5% (v/v) HNO<sub>3</sub>, 150 s UV irradiation time, and 0.77 mL of air slug preceding the sample; c) Cd, 40% (v/v) FA, 30 mg L<sup>-1</sup> Co<sup>2+</sup>, 80 s UV irradiation time, and 1.28 mL of air slug preceding the sample; Ni, 50% (v/v) FA, 180 s UV irradiation time, and 1.28 mL of air slug preceding the sample; d) Hg, 15% (v/v) FA, and 13 s UV irradiation time, and 3.20 mL of air slug preceding the sample; Mo, 20% (v/v) FA, 20 mg L<sup>-1</sup> Co<sup>2+</sup>, 2.5 mg L<sup>-1</sup> Cu<sup>2+</sup>, and 60 s UV irradiation time, and 1.28 mL of air slug preceding the sample.

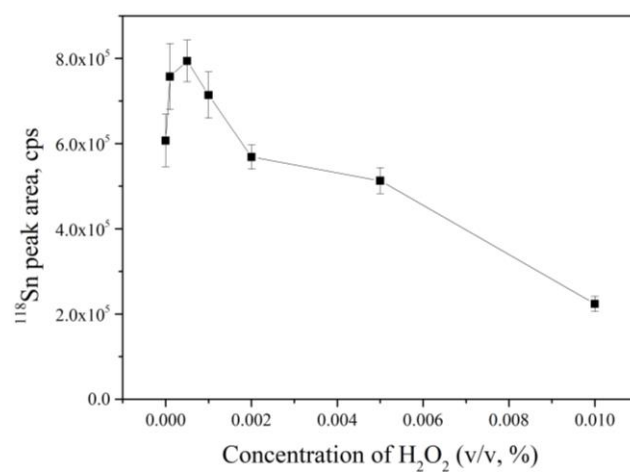

Figure S4. Effect of the concentration of  $\text{H}_2\text{O}_2$  on  $^{118}\text{Sn}$  response with 32 s UV irradiation in the absence of gas-liquid interface.

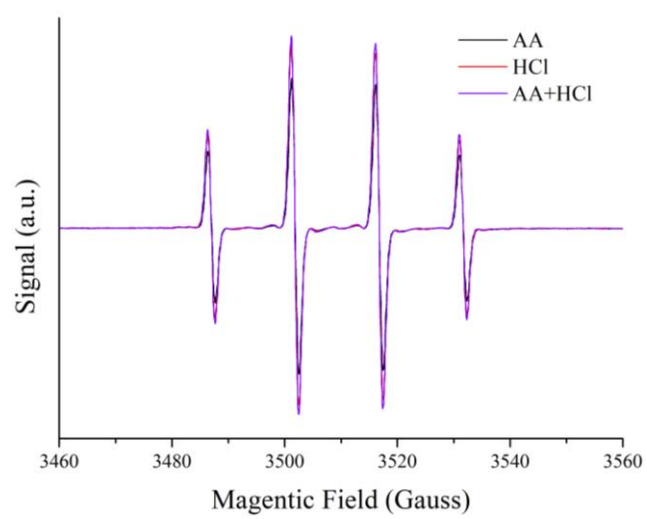

Figure S5. EPR results for PVG medium of Sn in LS-FI-PVG system: 0.01% (v/v) HCl, or/and 0.8% (v/v) AA.

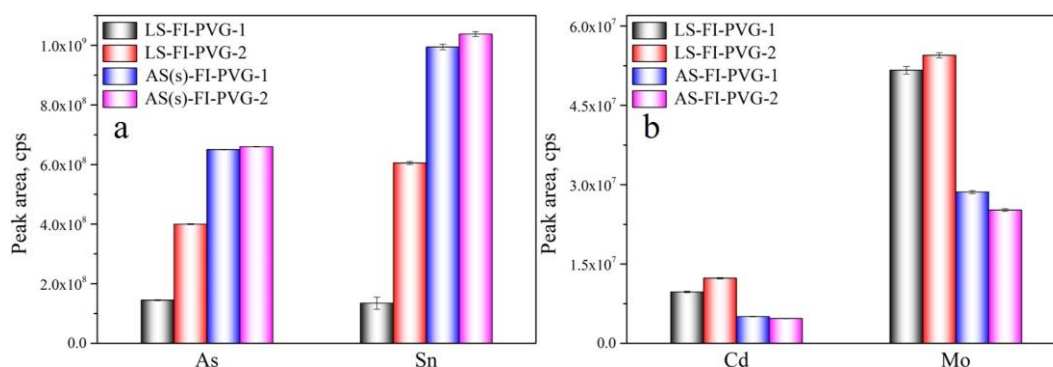

Figure S6. Effect of the internal temperature of PVG reactor on  $^{118}\text{Sn}$ ,  $^{75}\text{As}$ ,  $^{111}\text{Cd}$ , and  $^{98}\text{Mo}$  responses: a)  $5 \text{ ng mL}^{-1}$  As, 4% (v/v) FA, 20% (v/v) AA,  $15 \text{ mg L}^{-1} \text{ Fe}^{3+}$ , and 30 s irradiation;  $50 \text{ ng mL}^{-1}$  Sn, 0.8% (v/v) AA, 0.01% (v/v) HCl, and 32 s irradiation; b)  $20 \text{ ng mL}^{-1}$  Cd, 40% (v/v) FA,  $30 \text{ mg L}^{-1} \text{ Co}^{2+}$ , and 80 s irradiation;  $10 \text{ ng mL}^{-1}$  Mo, 20% (v/v) FA,  $20 \text{ mg L}^{-1} \text{ Co}^{2+}$ ,  $2.5 \text{ mg L}^{-1} \text{ Cu}^{2+}$ , and 60 s UV irradiation time.

LS-FI-PVG-1: the blank solution was firstly introduced into the PVG reactor and followed by sample solution as described in the section of Analytical Procedure.

LS-FI-PVG-2: the blank solution was firstly introduced into the PVG reactor and undergone UV irradiation for a while (with the total UV irradiation time of 45 s for As, 25 s for Sn, and 20 s for Cd and Mo) and then sample solution was introduced into the reactor for PVG.

AS(s)-FI-PVG-1: the air slug was firstly injected into the PVG reactor and undergone UV irradiation for a while (with the total UV irradiation time of 45 s for As, 25 s for Sn, and 20 s for Cd and Mo) and then sample solution was introduced into the reactor for PVG.

AS(s)-FI-PVG-2: the air slug was injected continuously into PVG reactor (45 s for As, 25 s for Sn, and 20 s for Cd, Mo) and then sample solution was introduced into the reactor for PVG.



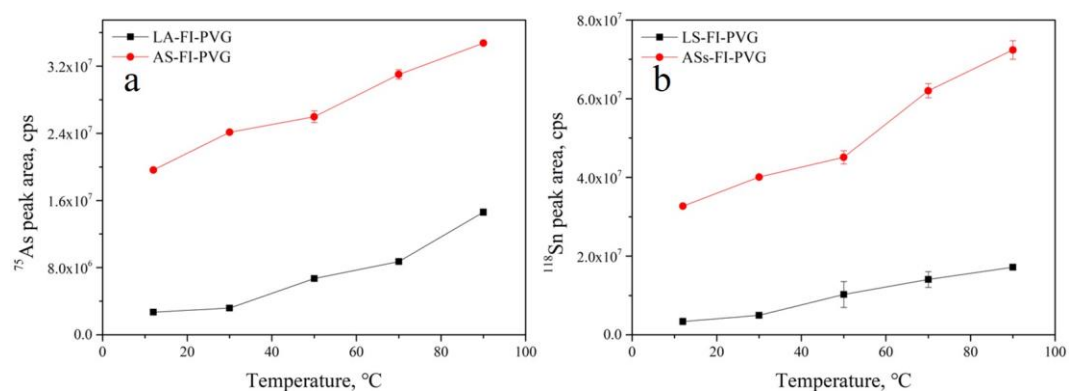

Figure S7. Effect of the sample solution temperature on  $^{75}\text{As}$  and  $^{118}\text{Sn}$  response in LS-FI-PVG and AS(s)-FI-PVG systems: a) As, 4% (v/v) FA, 20% (v/v) AA,  $15 \text{ mg L}^{-1} \text{ Fe}^{3+}$ , and 30 s irradiation; b) Sn, 0.8% (v/v) AA, 0.01% (v/v) HCl, and 32 s irradiation.

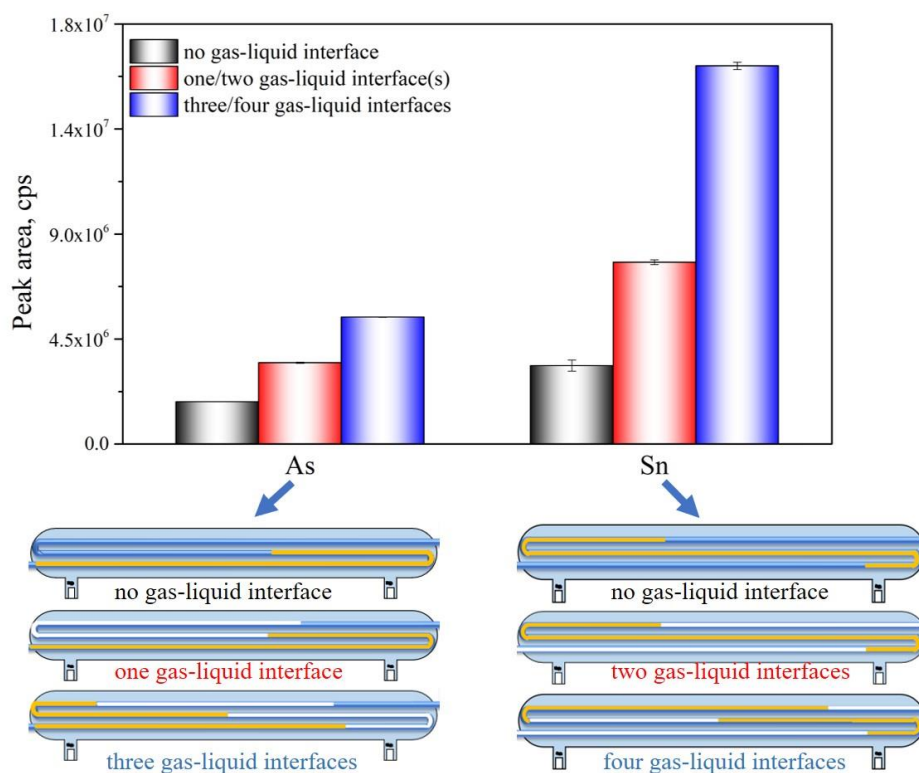

Blue color: the PVG medium; yellow color: sample solution; white color: air slug.

Figure S8. Effect of the gas-liquid interfaces on As and Sn detection with 0.3 mL of sample consumption and 0.3 mL of total air-segmented: As, 4% (v/v) FA, 20% (v/v) AA,  $15 \text{ mg L}^{-1} \text{ Fe}^{3+}$ , and 30 s irradiation; Sn, 0.8% (v/v) AA, 0.01% (v/v) HCl, and 32 s irradiation.

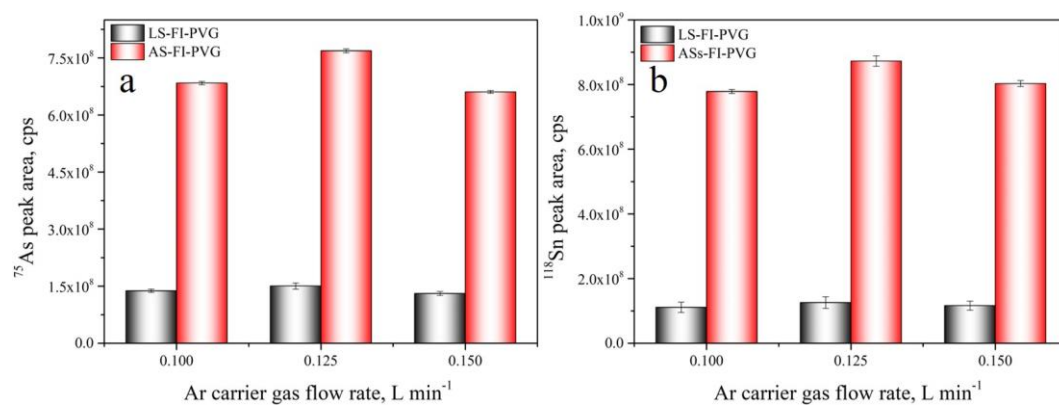

Figure S9. Effect of the Ar carrier gas flow rate on As and Sn responses in PVG. a) As, 4% (v/v) FA, 20% (v/v) AA, 15 mg L<sup>-1</sup> Fe<sup>3+</sup>, and 30 s irradiation; b) Sn, 0.8% (v/v) AA, 0.01% (v/v) HCl, and 32 s irradiation.

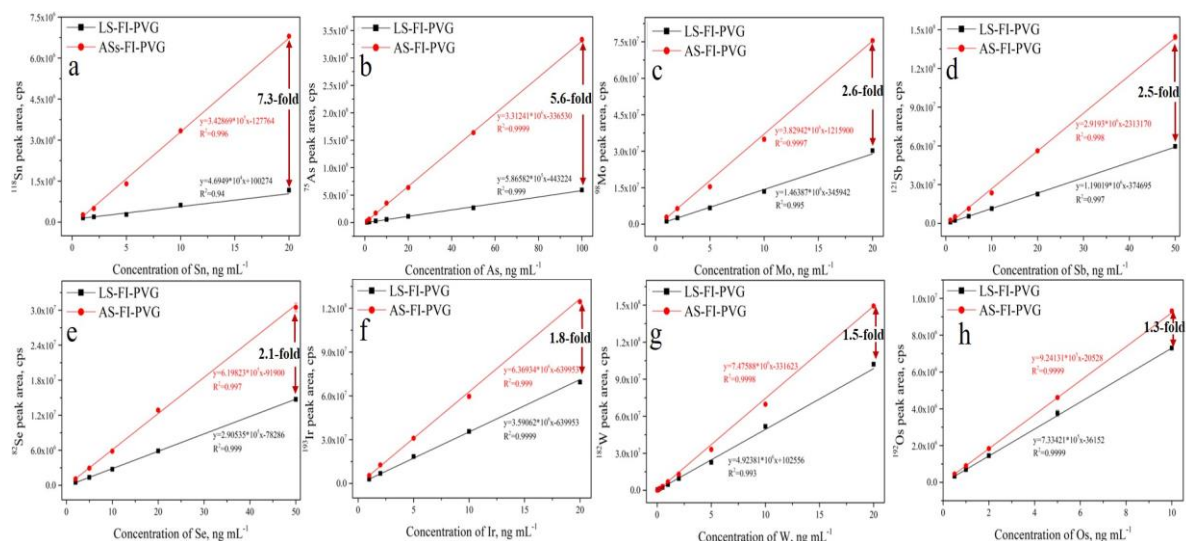

Figure S10. Calibration curves established using LS-FI-PVG and AS(s)-FI-PVG methods for elements: a) Sn, 0.8% (v/v) AA, 0.01% (v/v) HCl, 32 s UV irradiation time in the presence or absence of 1.60 mL air slugs; b) As, 4% (v/v) FA, 20% (v/v) AA, 15 mg L<sup>-1</sup> Fe<sup>3+</sup>, and 30 s irradiation in the presence or absence of 2.88 mL air slug; c) Mo, 30% (v/v) FA, 38 s UV irradiation time in the presence or absence of 1.09 mL air slug; d) Sb, 5% (v/v) FA, 15% (v/v) AA, 60 s UV irradiation time in the presence or absence of 2.24 mL air slug; e) Se (IV), 15% (v/v) FA, 13 s UV irradiation time in the presence or absence of 2.88 mL air slug; f) Ir, 20% (v/v) FA, 25 mg L<sup>-1</sup> Cu<sup>2+</sup>, 45 s UV irradiation time in the presence or absence of 1.60 mL air slug; g) W, 40% (v/v) FA, 500 mg L<sup>-1</sup> Cd<sup>2+</sup>, 120 s UV irradiation time in the presence or absence of 2.24 mL air slug; h) Os, 5% (v/v) HNO<sub>3</sub>, 150 s UV irradiation time in the presence or absence of 0.77 mL air slug.

Table S1. Precision (n=7) obtained using peak area by LS-FI-PVG and AS(s)-FI-PVG methods.

| Analytes | RSD %     |              |
|----------|-----------|--------------|
|          | LS-FI-PVG | AS(s)-FI-PVG |
| Sn       | 8.6       | 3.0          |
| As       | 2.9       | 1.6          |
| Bi       | 2.3       | 1.5          |
| Se       | 3.2       | 1.1          |
| Sb       | 2.6       | 2.4          |
| W        | 3.6       | 3.0          |
| Os       | 2.8       | 3.3          |
| Mo       | 3.7       | 3.1          |
| Ir       | 3.8       | 2.8          |

Table S2. Interferences from coexisting ions obtained in AS(s)-FI-PVG system.

| Element | Interfering ions             | Concentration (mg L <sup>-1</sup> ) | [Interferent]/<br>Analytes | Recovery/% |              |
|---------|------------------------------|-------------------------------------|----------------------------|------------|--------------|
|         |                              |                                     |                            | LS-FI-PVG  | AS(s)-FI-PVG |
| As      | Co <sup>2+</sup>             | 0.2                                 | 400                        | 127±1      | 129±2        |
|         | Cu <sup>2+</sup>             | 0.4                                 | 800                        | 83±2       | 76±1         |
|         | Ni <sup>2+</sup>             | 1                                   | 2000                       | 106±1      | 111±1        |
| Bi      | Co <sup>2+</sup>             | 0.02                                | 40                         | 109±1      | 110±1        |
| Mo      | NO <sub>2</sub> <sup>-</sup> | 0.05                                | 100                        | 76±1       | 73±1         |
|         | NO <sub>3</sub> <sup>-</sup> | 0.02                                | 40                         | 82±1       | 91±1         |
| Sn      | Fe <sup>3+</sup>             | 0.05                                | 100                        | 112±3      | 103±1        |
|         | Co <sup>2+</sup>             | 0.02                                | 40                         | 106±2      | 105±1        |
|         | Ni <sup>2+</sup>             | 0.02                                | 40                         | 104±1      | 106±1        |
|         | Cu <sup>2+</sup>             | 0.02                                | 40                         | 27±2       | 46±1         |
